# Supplementary material
Source: publisher figshare collection journal article supplement (https://frontiersin.figshare.com/ndownloader/files/11863868)

**Figure S1.** Carbon steel disk (CSD) upon removal from microcosm at  $t = 2$  weeks (top left); CSD ( $t = 2$  weeks) after biofilm removal (top right); Tower containing CSDs in microcosm tank (bottom).

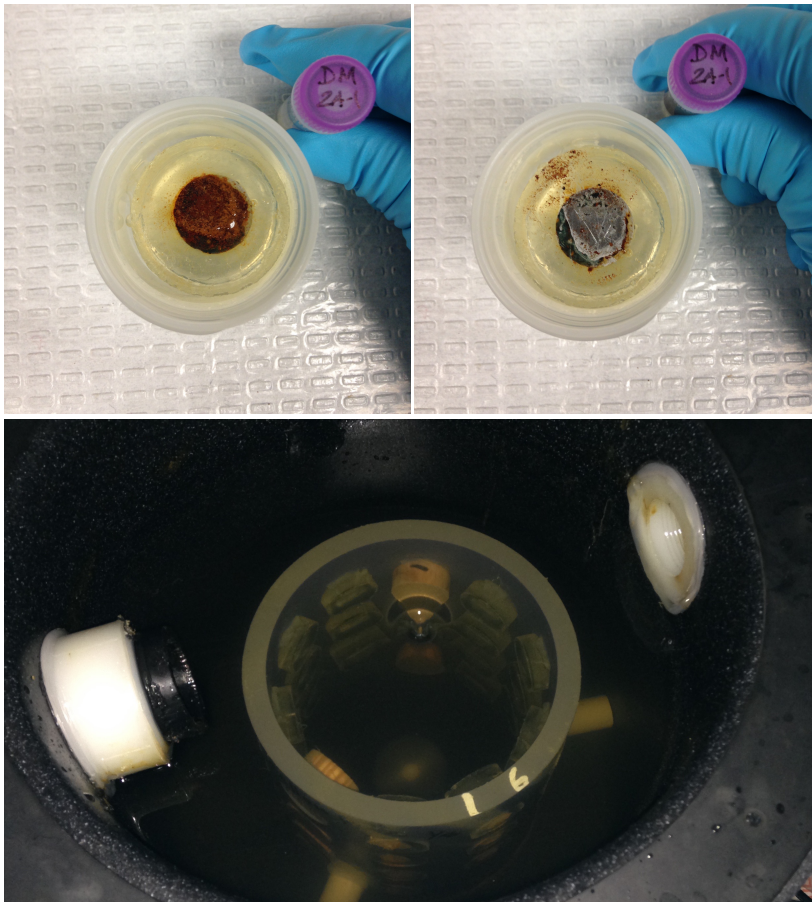

Supplement: Supplementary file 1 [file 11863868]
